# Supplementary material
Source: PubMed Central journal article supplement (PMC7805566)

# Supplemental Information

## 8-Cyanobenzothiazinone analogs with potent antitubercular activity

Gang Zhang<sup>†</sup>, Li Sheng<sup>†</sup>, Pooja Hegde<sup>‡</sup>, Yan Li<sup>†</sup>, and Courtney C. Aldrich<sup>†, ‡,\*</sup>

<sup>†</sup>State Key Laboratory of Bioactive Substances and Function of Natural Medicine, Institute of Materia Medica, Peking Union Medical College and Chinese Academy of Medical Sciences, Beijing 100050, China

<sup>‡</sup>Department of Medicinal Chemistry, University of Minnesota, Minneapolis, Minnesota 55455, United States

\*Corresponding author's email address: [caldrich@imm.ac.cn](mailto:caldrich@imm.ac.cn) or [aldri015@umn.edu](mailto:aldri015@umn.edu)

### Original Spectra (<sup>1</sup>H NMR, <sup>13</sup>C NMR and HRMS)

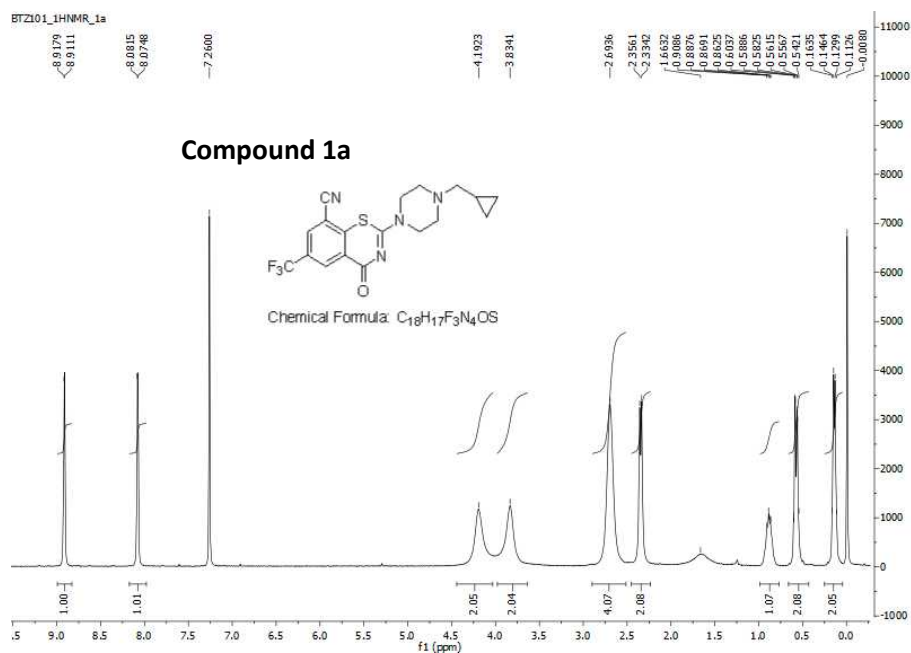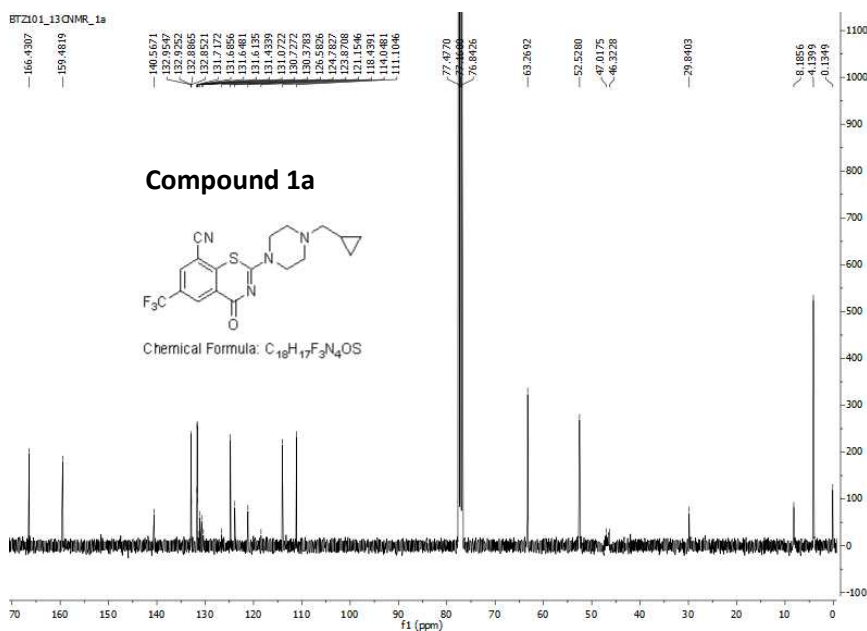

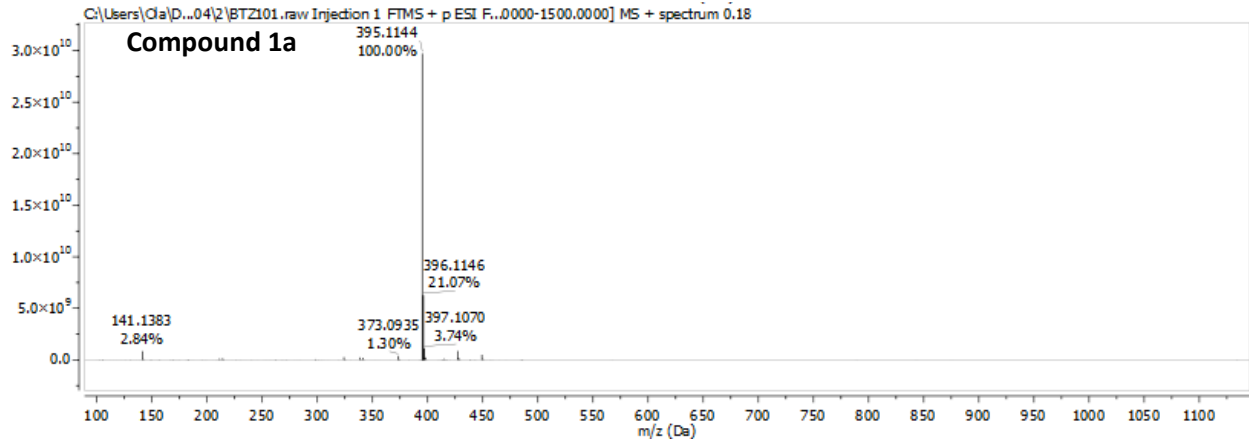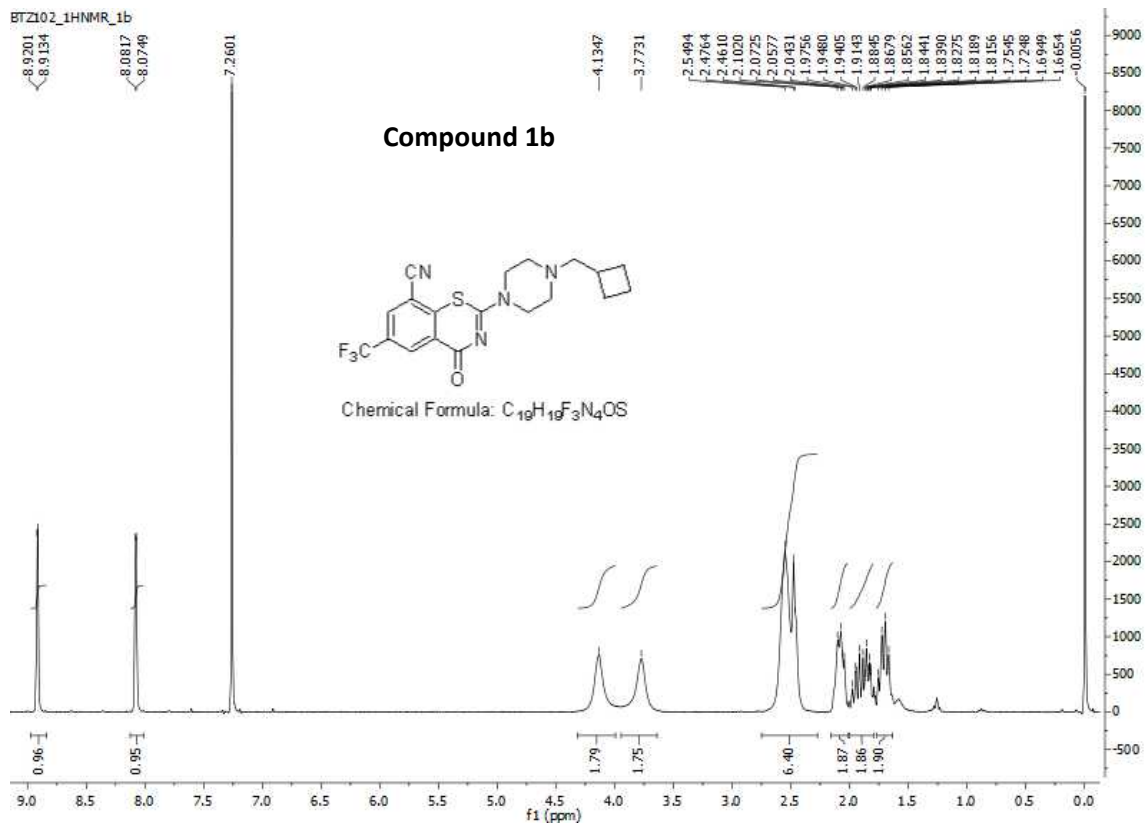

BTZ102\_13CNMR\_1b

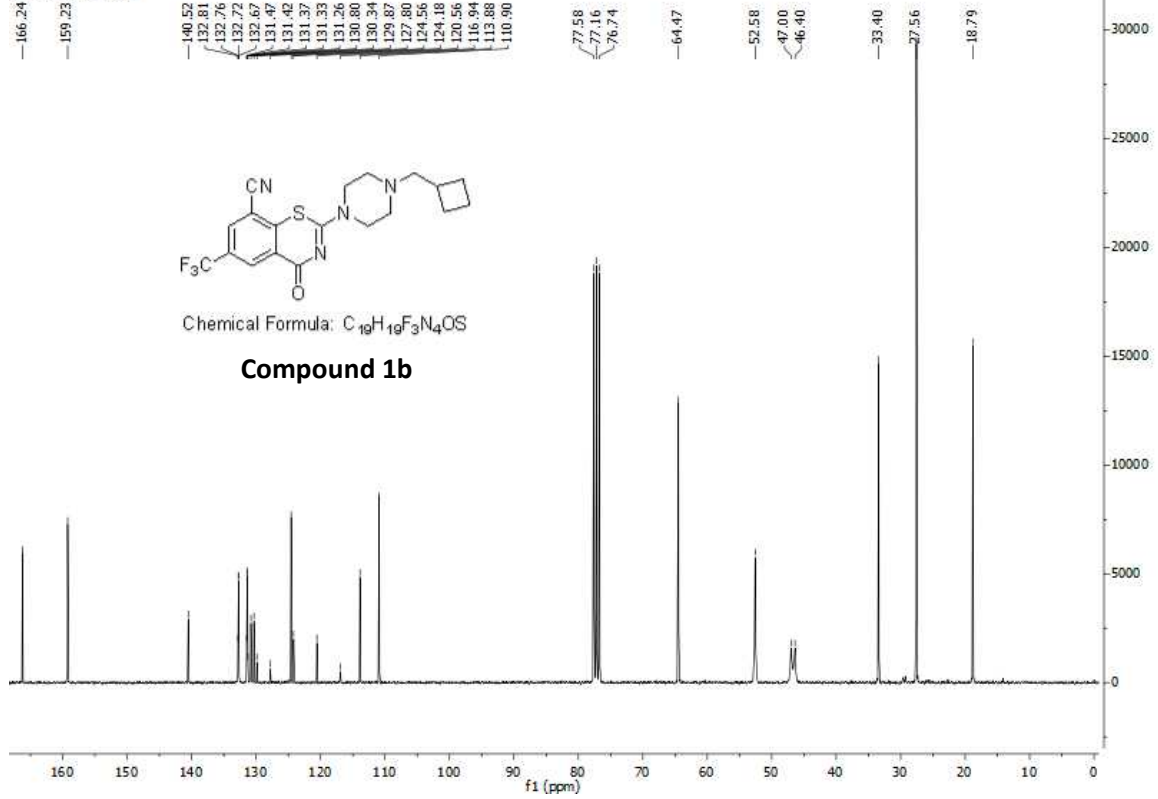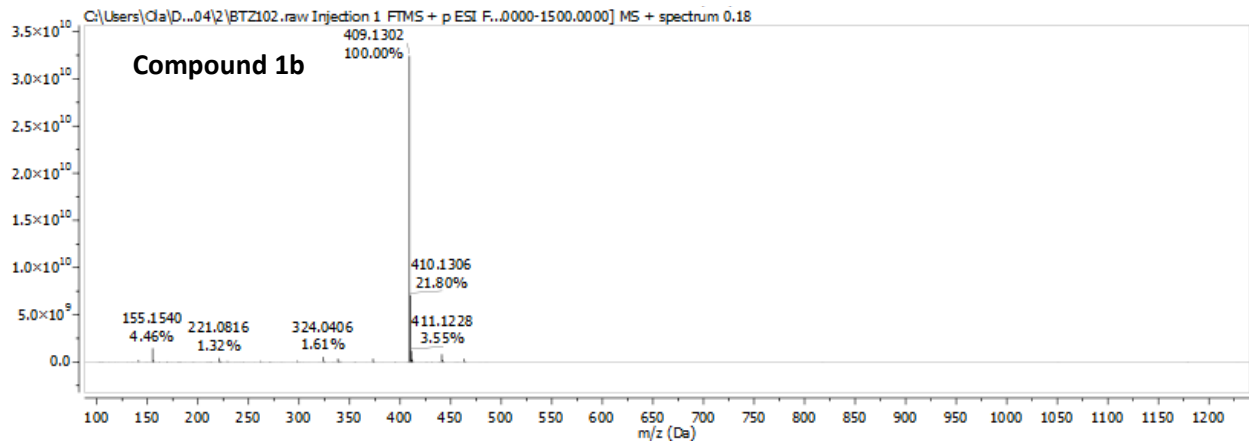

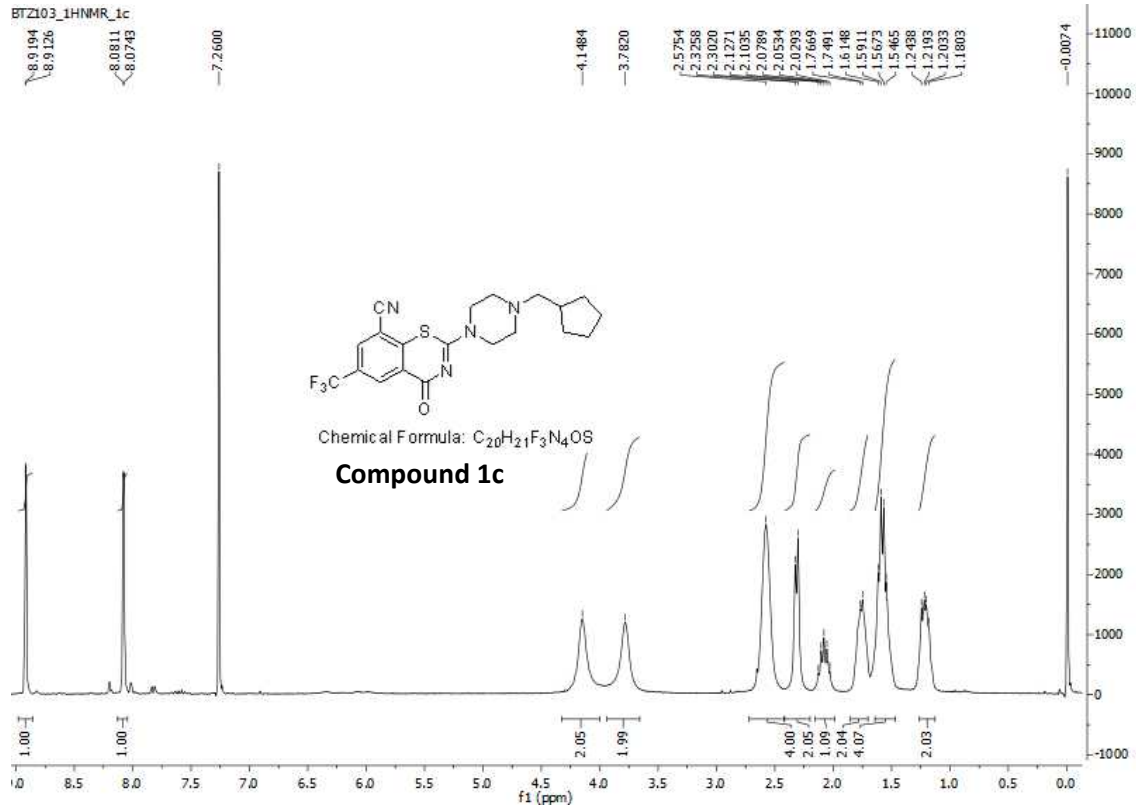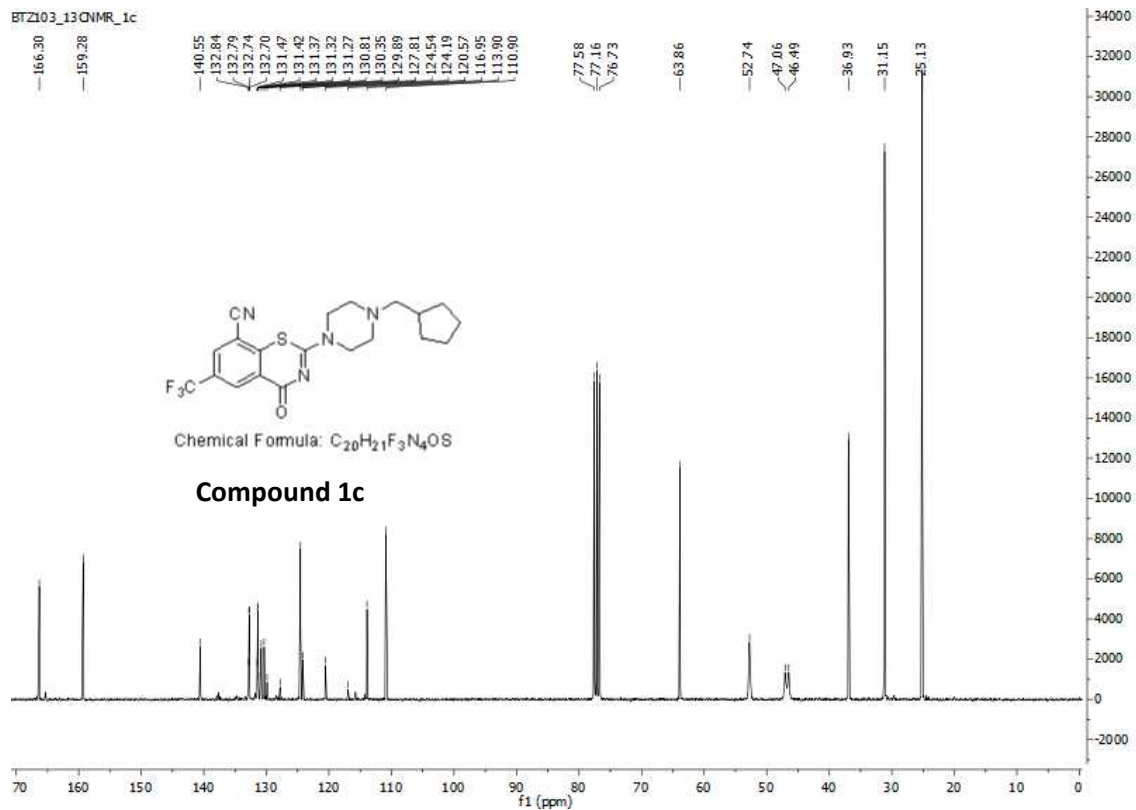

# Compound 1c

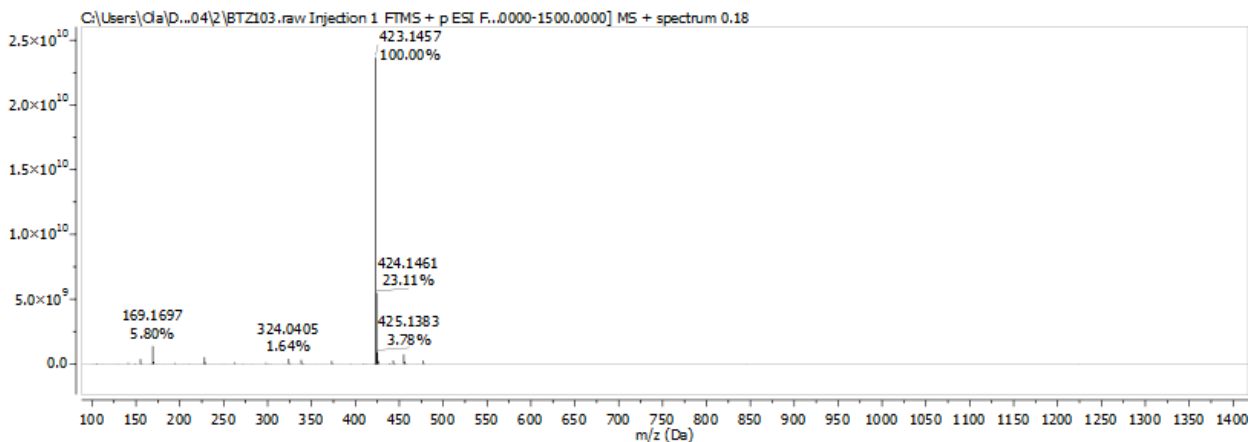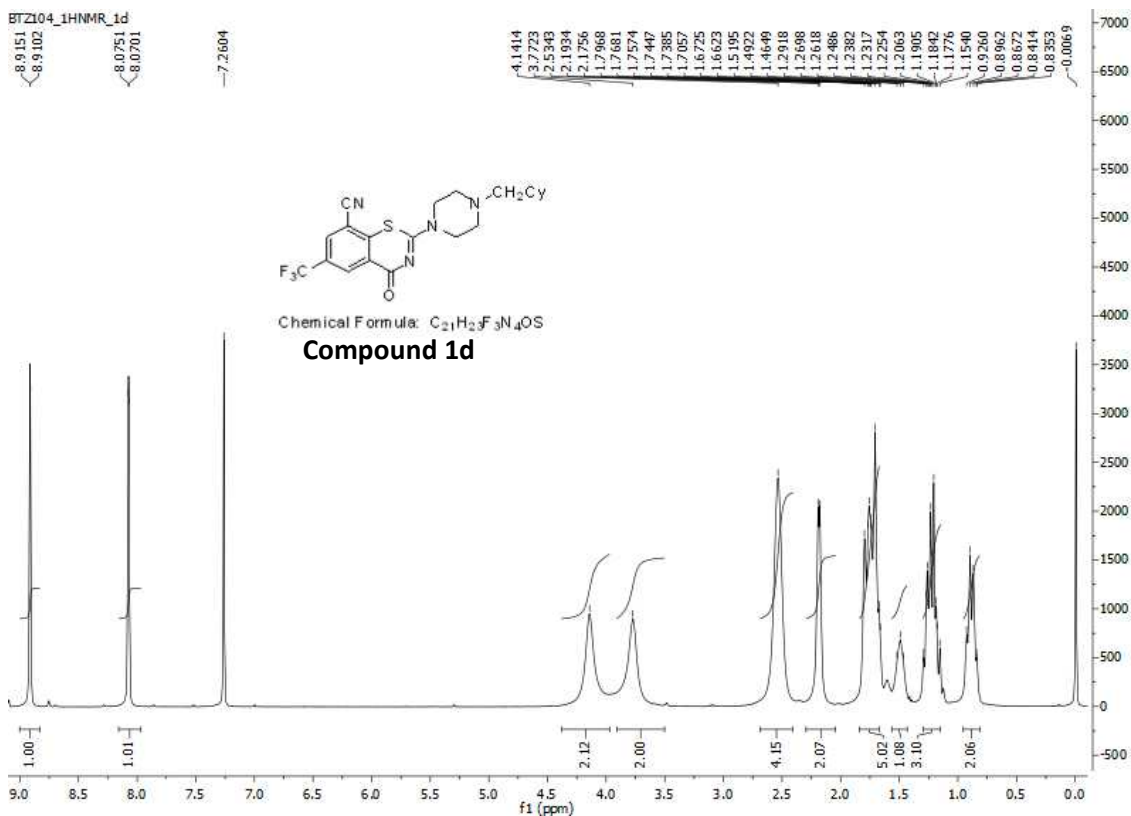

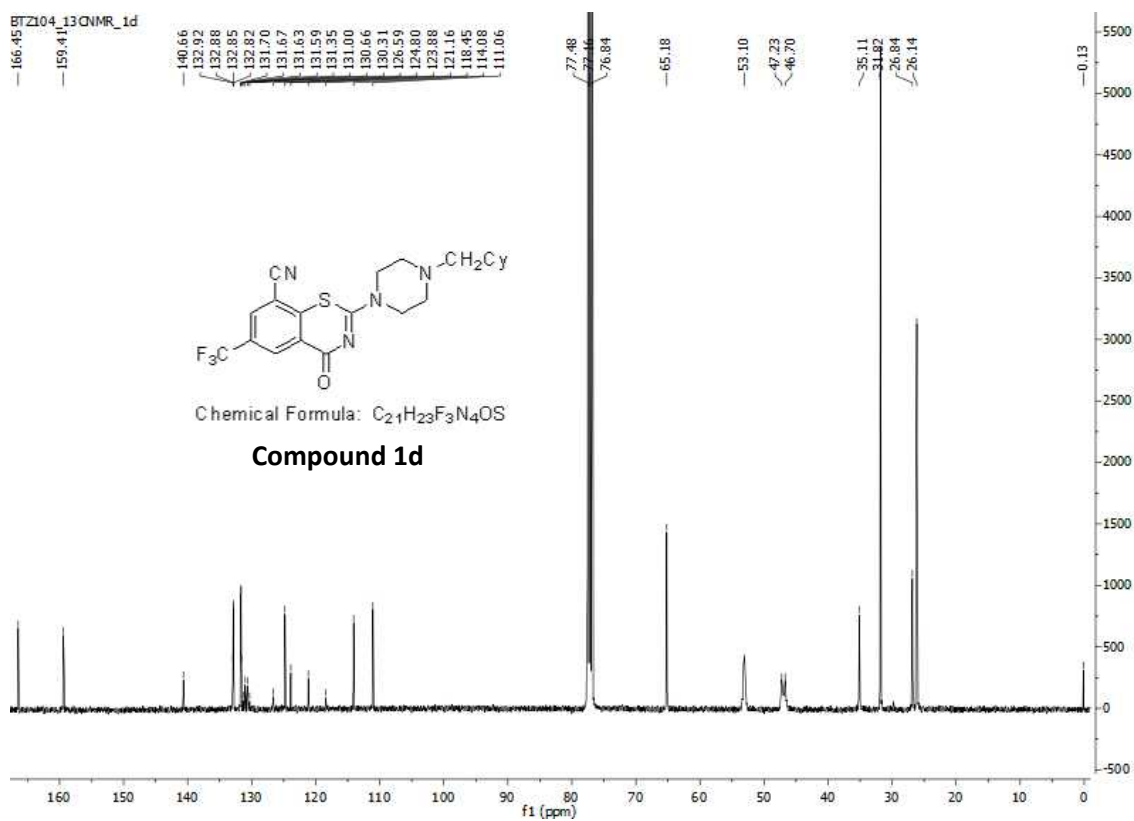

**Compound 1d**

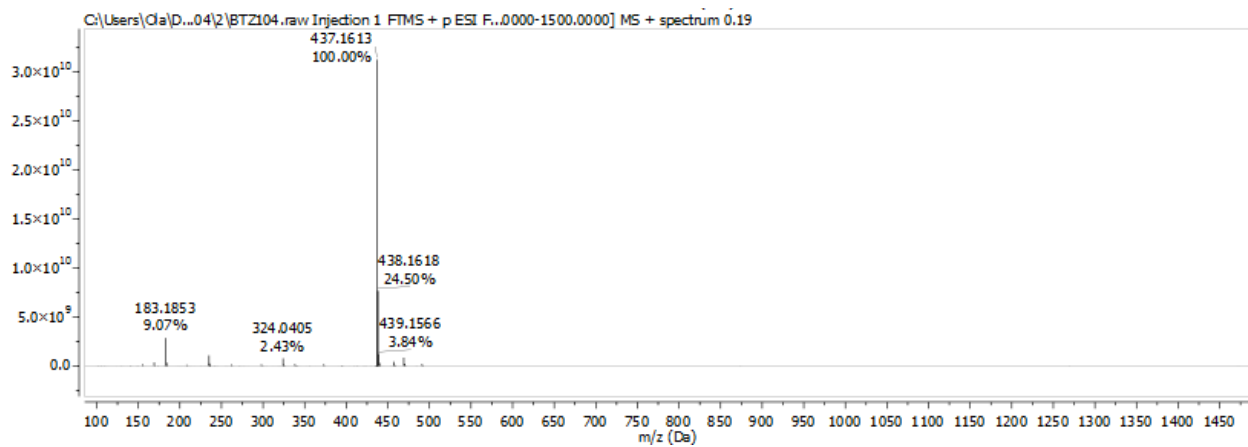

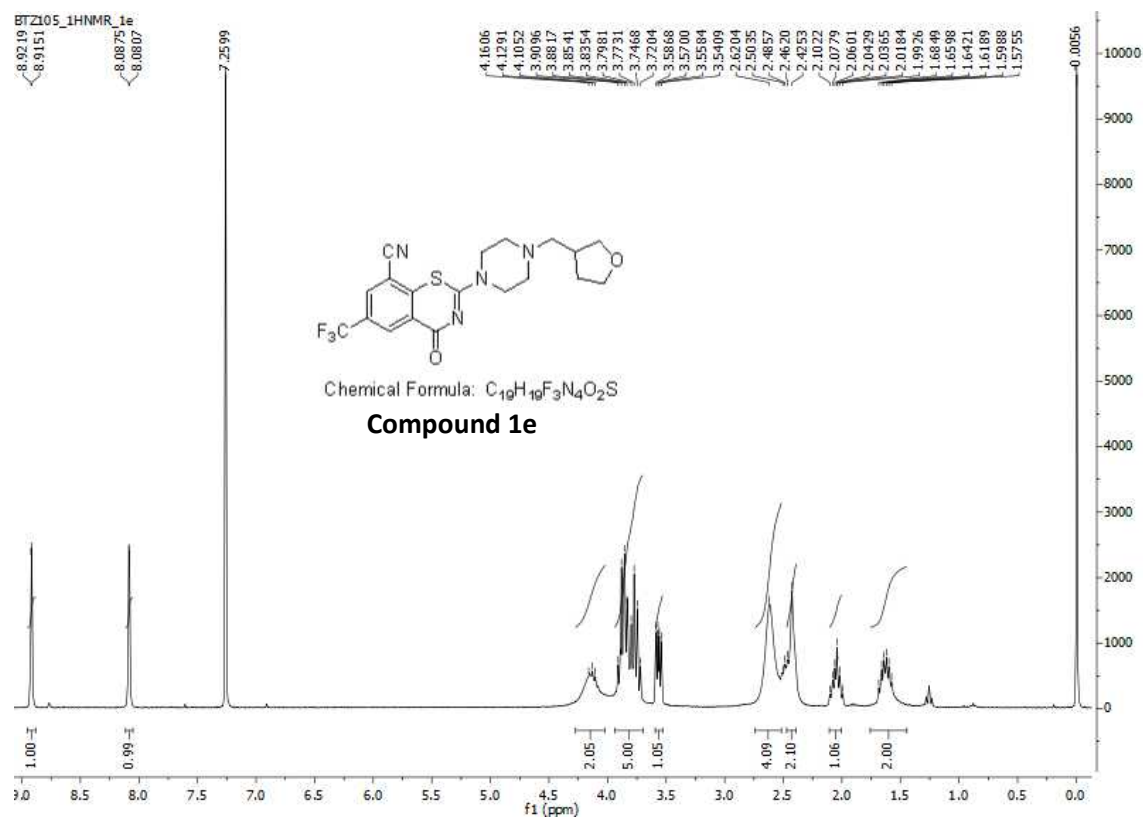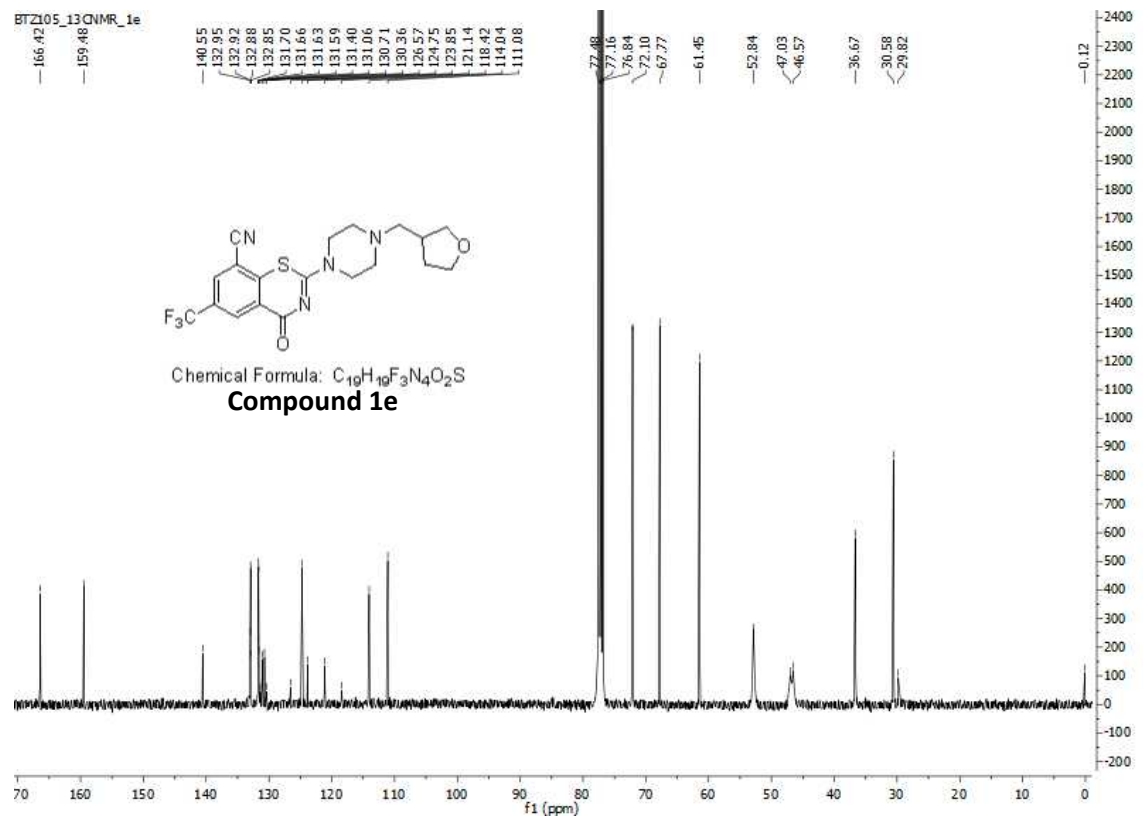

# Compound 1e

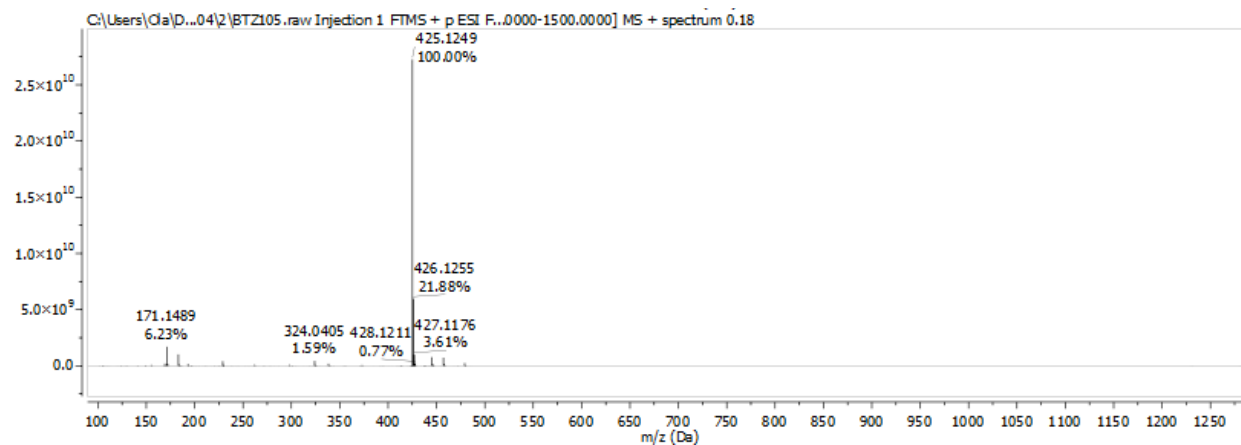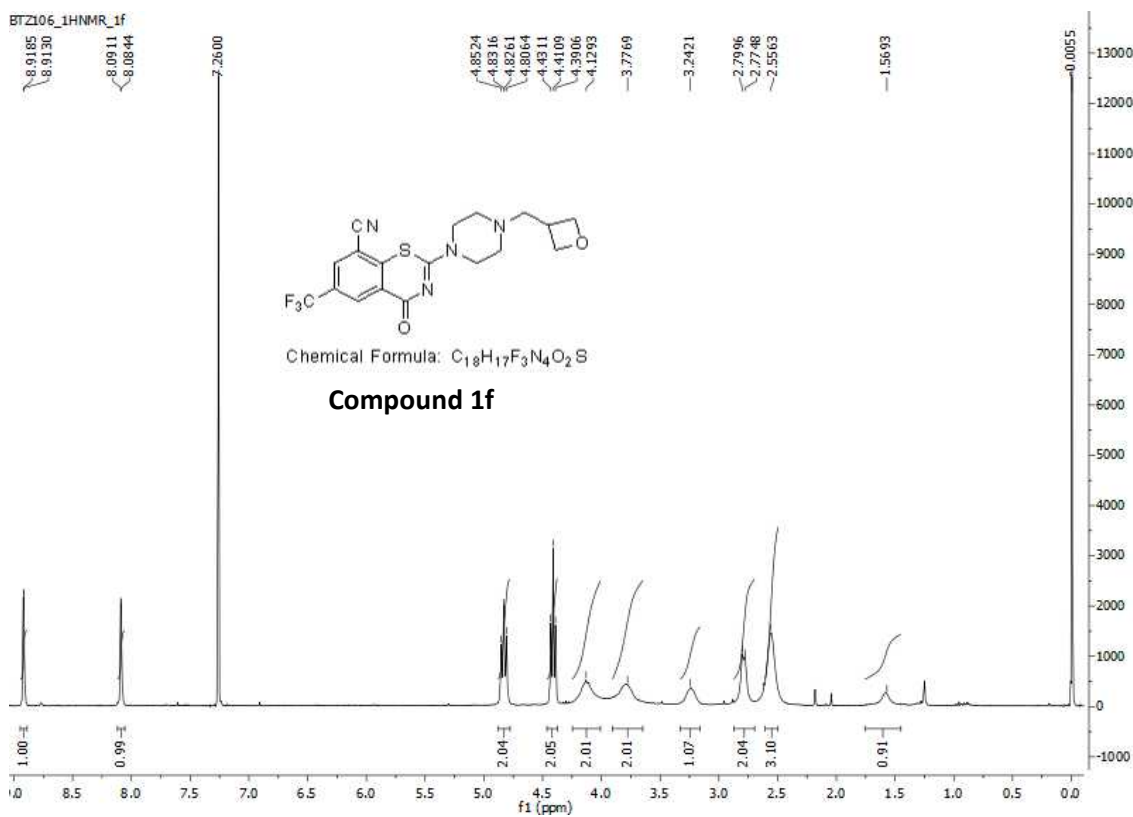



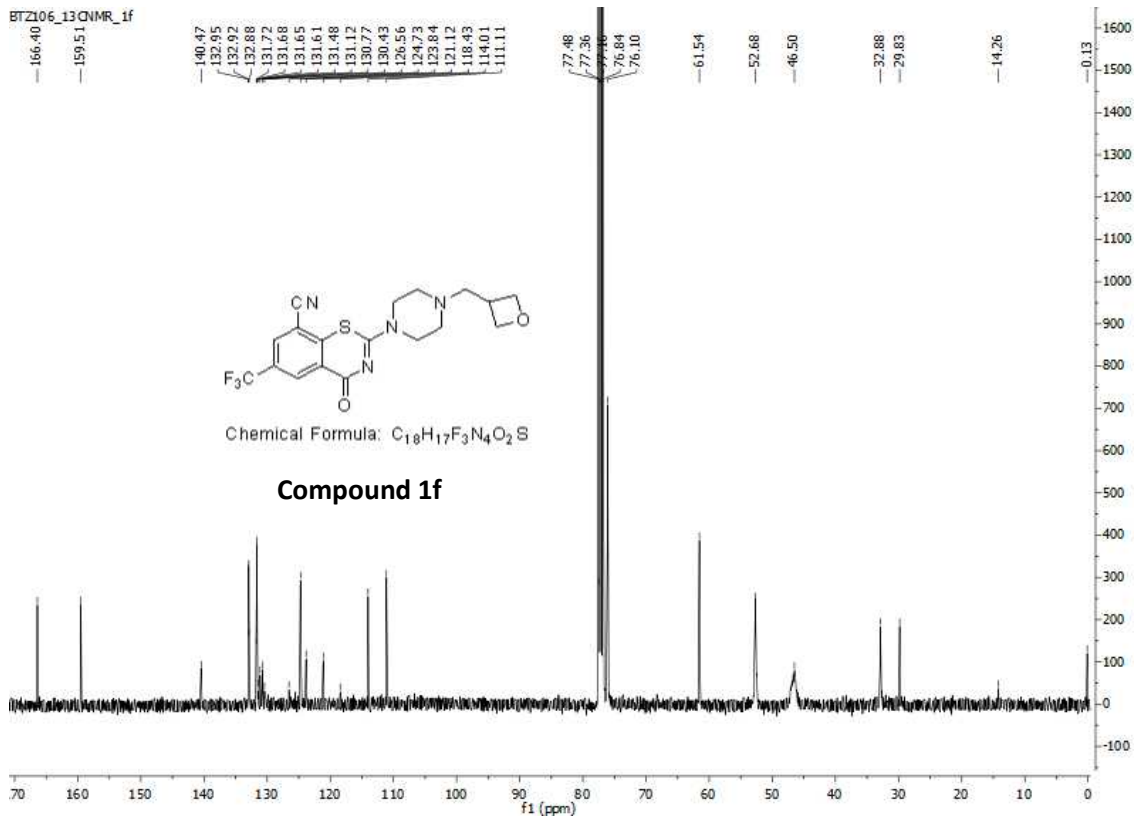

**Compound 1f**

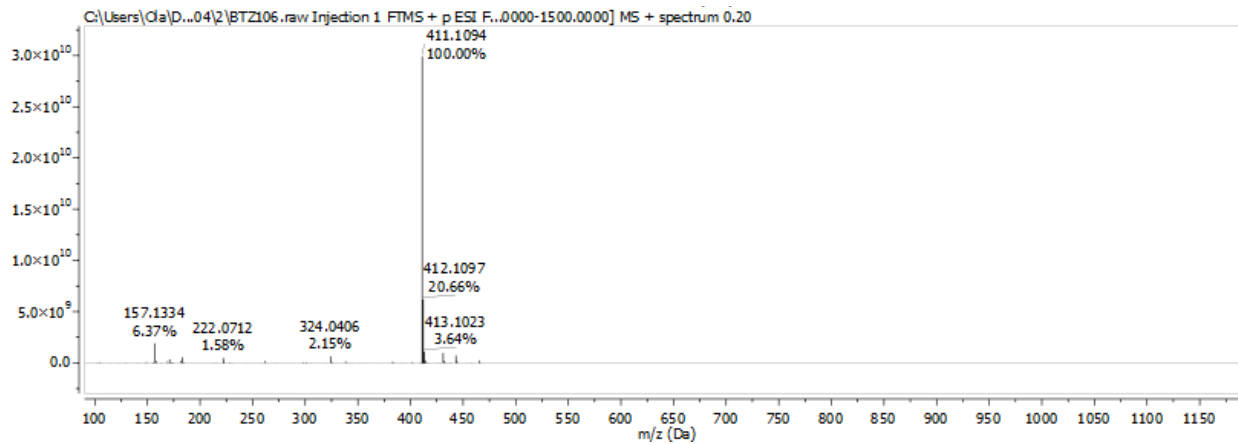

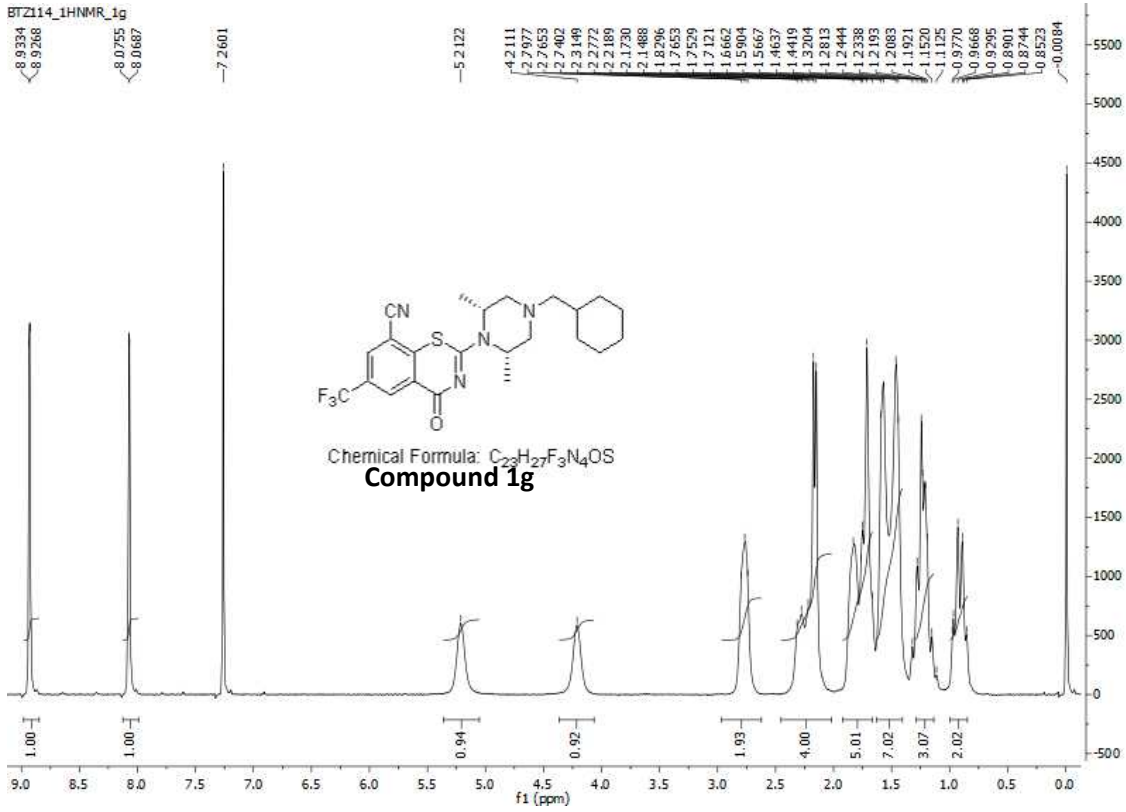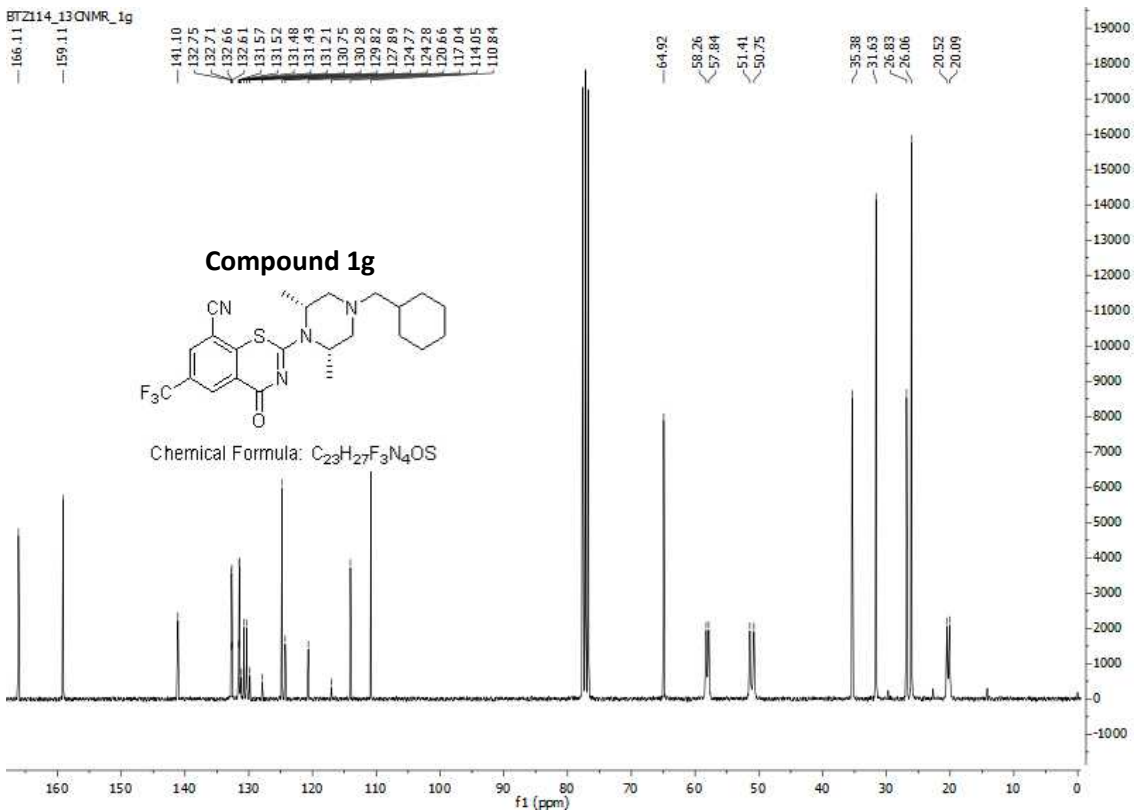

# Compound 1g

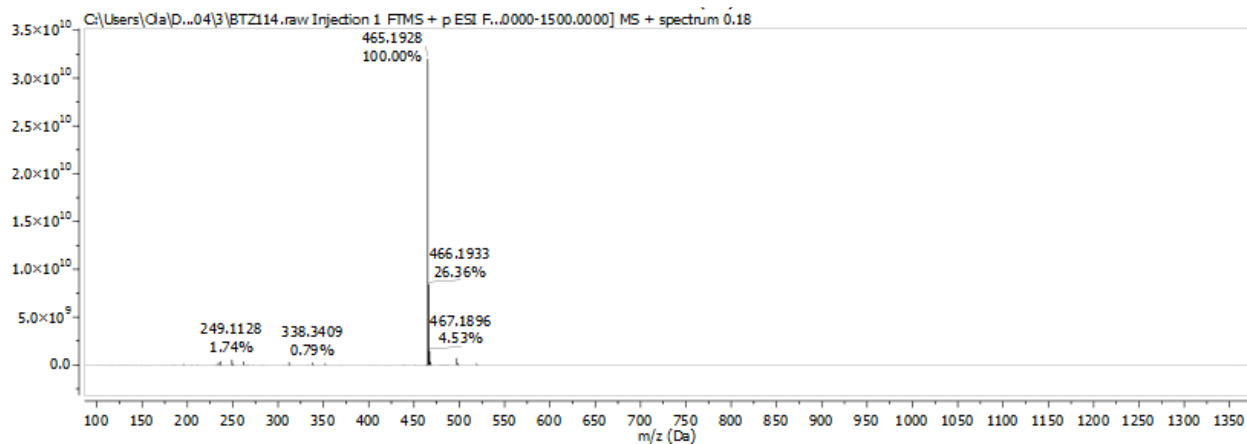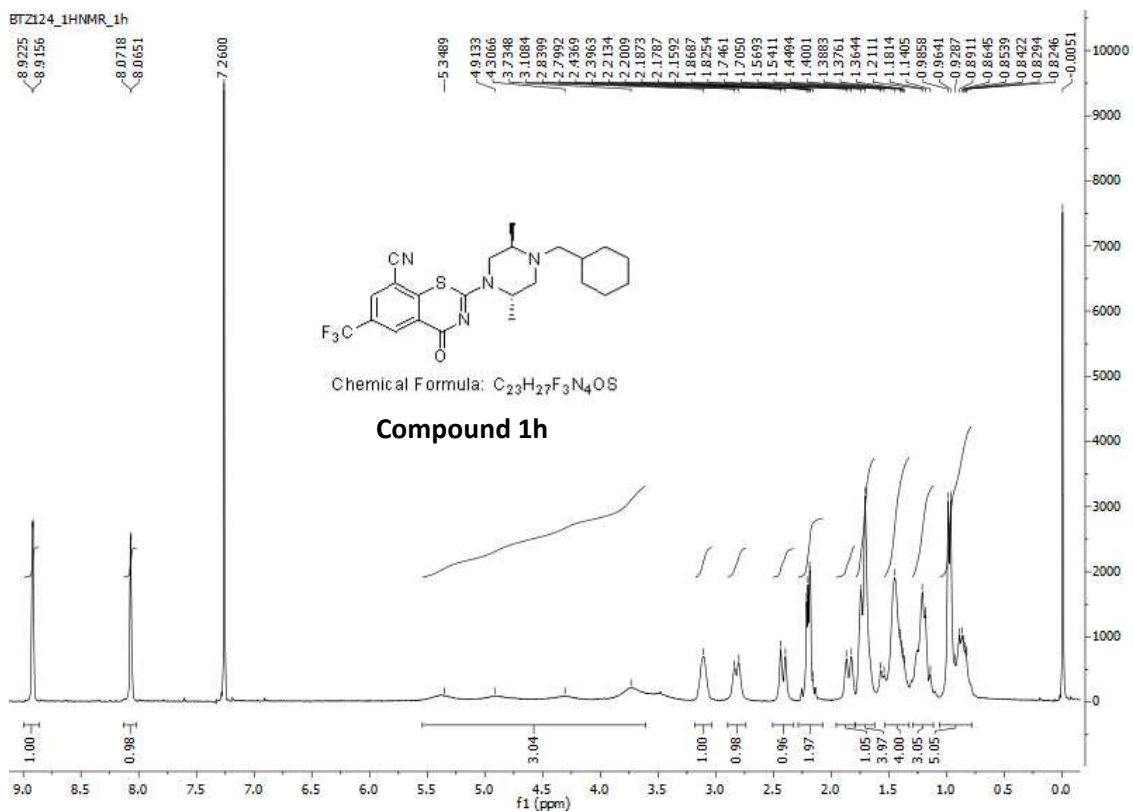

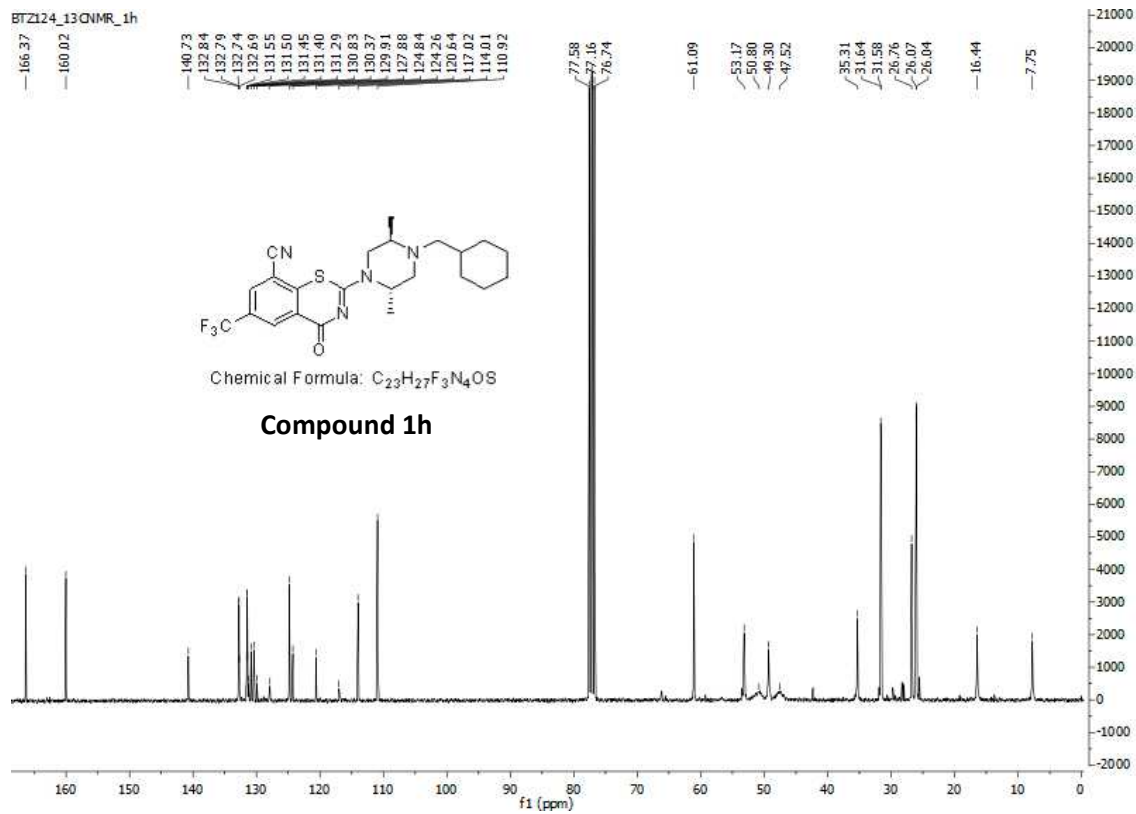

**Compound 1h**

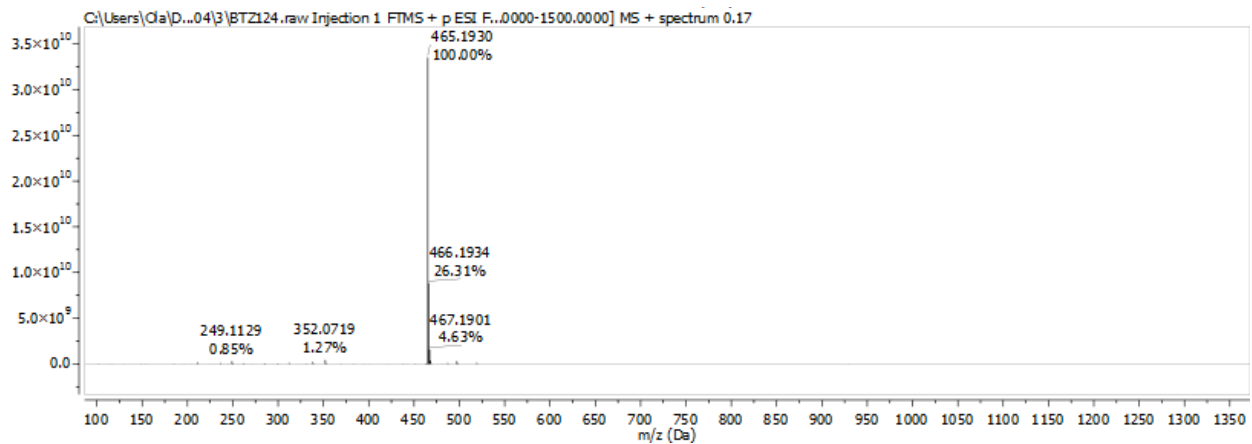

BTZ134\_1HNMR

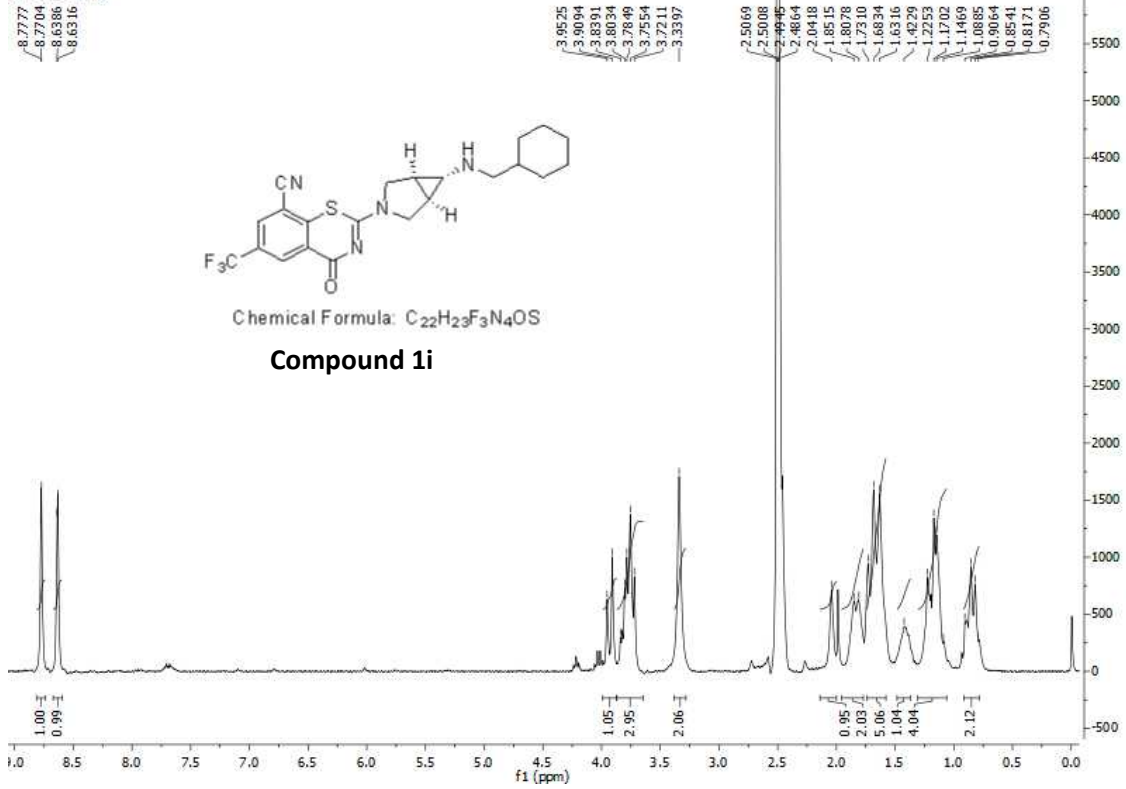

BTZ134\_13CNMR\_1i

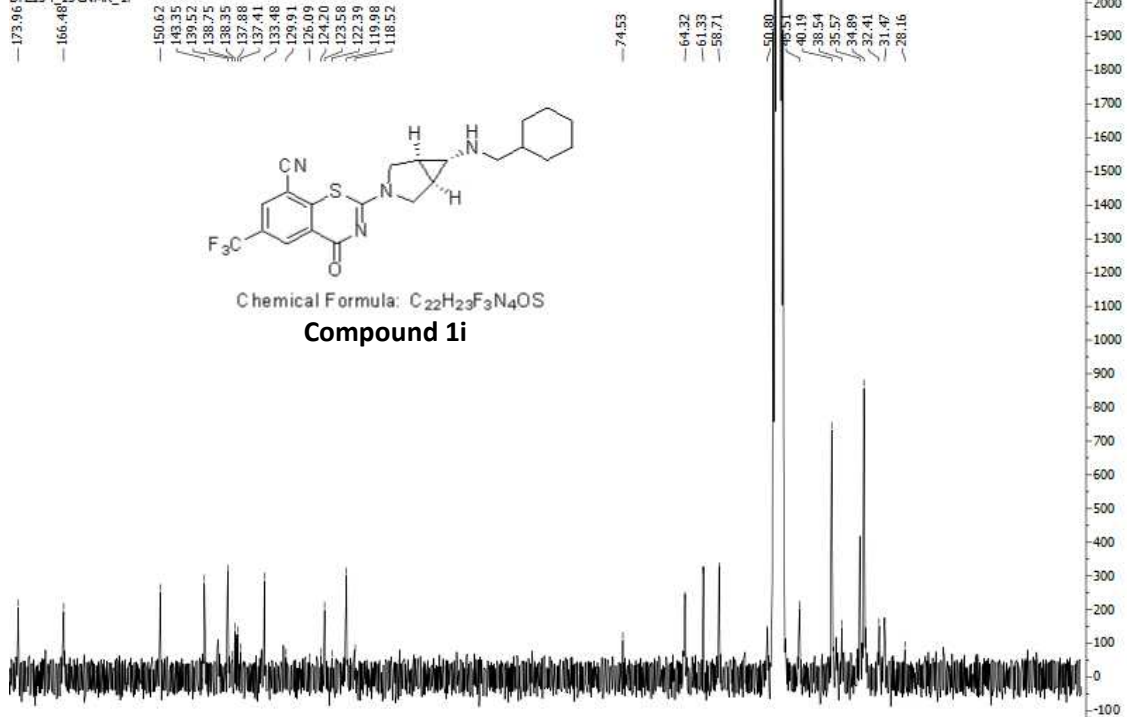

## Compound 1i

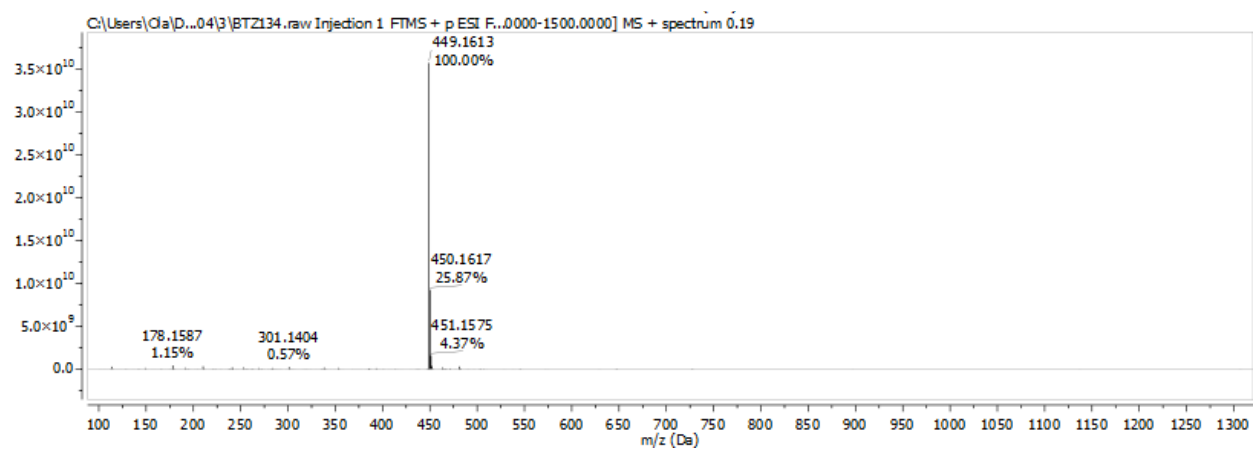

Supplement: 44_2020_2676_MOESM1_ESM.pdf [file 44_2020_2676_MOESM1_ESM.pdf]
